# Supplementary material for: High and specific diversity of protists in the deep-sea basins dominated by diplonemids, kinetoplastids, ciliates and foraminiferans
Source: PubMed Central journal article supplement (PMC8065057; doi:10.1038/s42003-021-02012-5), 2021-04-23
Supplement: 42003_2021_2012_MOESM2_ESM.pdf [file 42003_2021_2012_MOESM2_ESM.pdf]

## SUPPLEMENTARY INFORMATION FOR

### High and specific diversity of protists in the deep-sea basins dominated by diplomemids, kinetoplastids, ciliates and foraminiferans

*Alexandra Schoenle<sup>1\*</sup>, Manon Hohlfeld<sup>1</sup>, Karoline Hermanns<sup>1</sup>, Frédéric Mahé<sup>2,3</sup>, Colomban de Vargas<sup>4,5</sup>, Frank Nitsche<sup>1</sup>, Hartmut Arndt<sup>1\*</sup>*

<sup>1</sup> *University of Cologne, Biocenter, Institute for Zoology, General Ecology, Zùlpicher StraÙe 47b, 50674 Cologne, Germany.*

<sup>2</sup> *CIRAD, UMR BGPI, F-34398, Montpellier, France.*

<sup>3</sup> *BGPI, Univ Montpellier, CIRAD, IRD, Montpellier SupAgro, Montpellier, France.*

<sup>4</sup> *CNRS, Sorbonne Université, Station Biologique de Roscoff, UMR7144, ECOMAP -Ecology of Marine Plankton, 29680 Roscoff, France*

<sup>5</sup> *Research Federation for the study of Global Ocean Systems Ecology and Evolution, FR2022/ Tara GOSEE, Paris, France*

\*Corresponding authors

#### Supplementary Figures and Tables

Supplementary Figures 1 to 10

Supplementary Tables 1 and 2

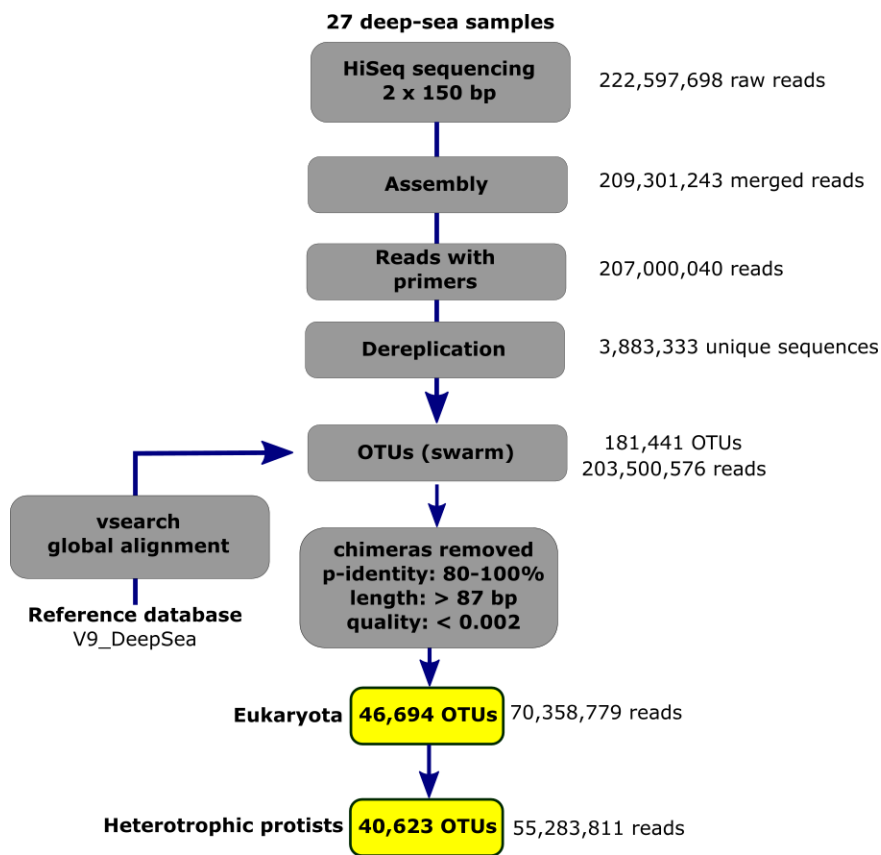

**Supplementary Figure 1 | Bioinformatic pipeline.** Raw V9 rDNA reads from 27 sediment samples taken at 20 stations from 11 deep-sea basins/regions were merged and only used for downstream analyses, when they contained both primers and no ambiguous N's. After de-replication, unique sequences (metabarcodes) with more than two reads were clustered into operational taxonomic units (OTUs) using the Swarm algorithm. A taxonomic path of the OTU representatives was assigned using StampA<sup>67</sup>. After removal of chimeras, OTUs with less than 80% p-identity, smaller than 87 bp and OTUs with a minimum expected error >0.002 led to a final eukaryotic dataset of 46,694 OTUs of which 40,623 OTUs could be assigned to heterotrophic protists.

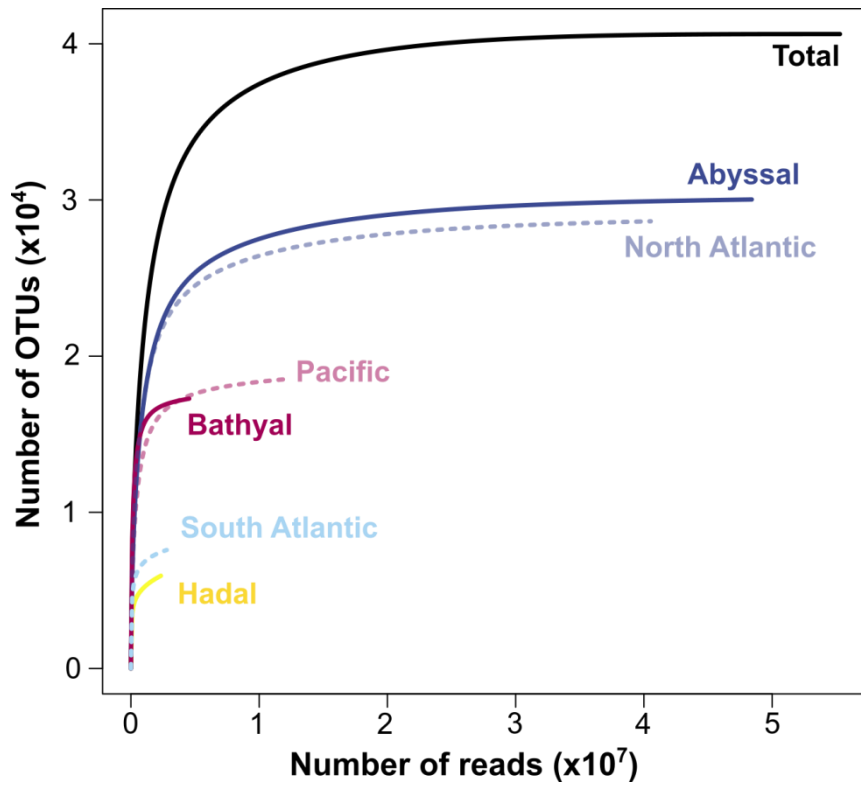

**Supplementary Figure 2 | Assessment of deep-sea protist richness.** V9 rDNA heterotrophic protist OTUs rarefaction curves from either region dependent (North Atlantic, South East Atlantic and Pacific Ocean) or depth dependent (bathyal, abyssal, hadal) clustering of all stations.

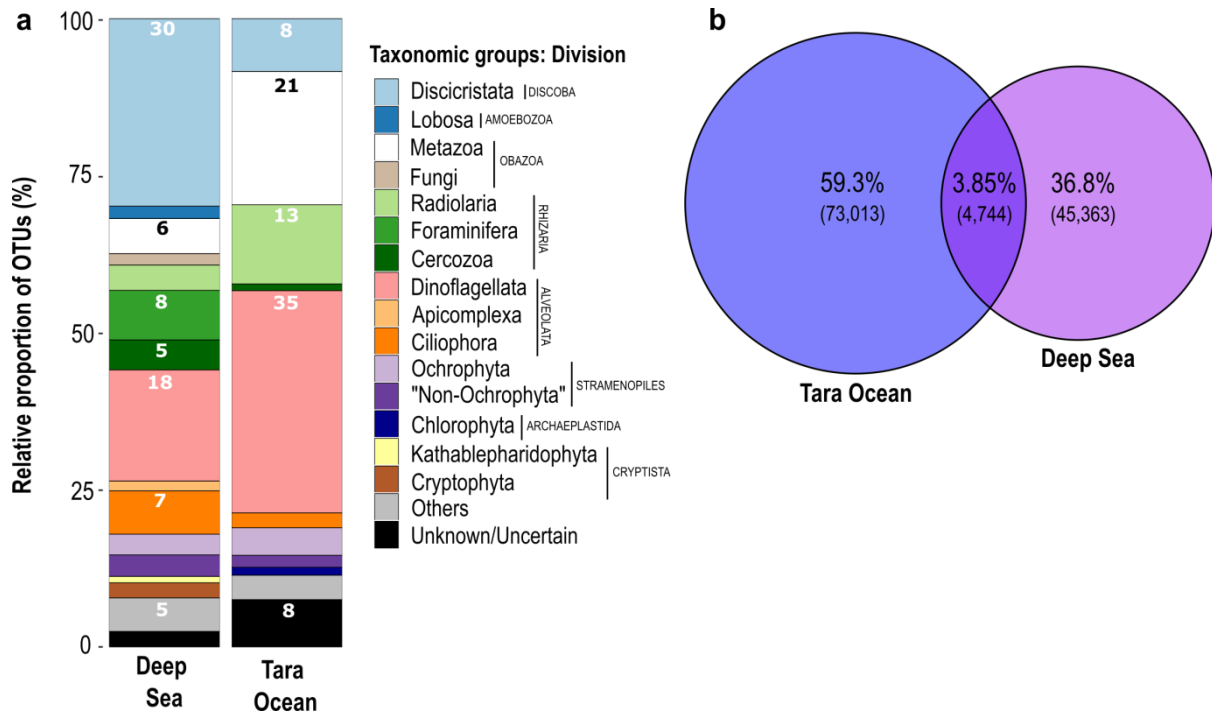

**Supplementary Figure 3 | Comparison of eukaryotic species richness from surface waters and the deep ocean.** (a) Relative proportion of eukaryotic OTUs (total of 123,120 OTUs) from the Tara Ocean data set and our deep-sea dataset blasted against our reference database V9\_DeepSea<sup>33</sup>. Taxonomic division levels are only separately shown, when the number of OTUs reached more than 1% within one of the two environments. Otherwise, OTUs were clustered together into “Others”. Unknown/Uncertain” OTUs have been either assigned to several taxonomic division levels or to sequences taxonomically assigned only to Eukaryota. (b) Venn-diagram showing the number of unique and shared OTUs between sampled surface waters within the Tara Ocean project (47 stations, total 77,757 OTUs) and the sediment samples from the deep sea (20 stations, total of 50,107 OTUs).

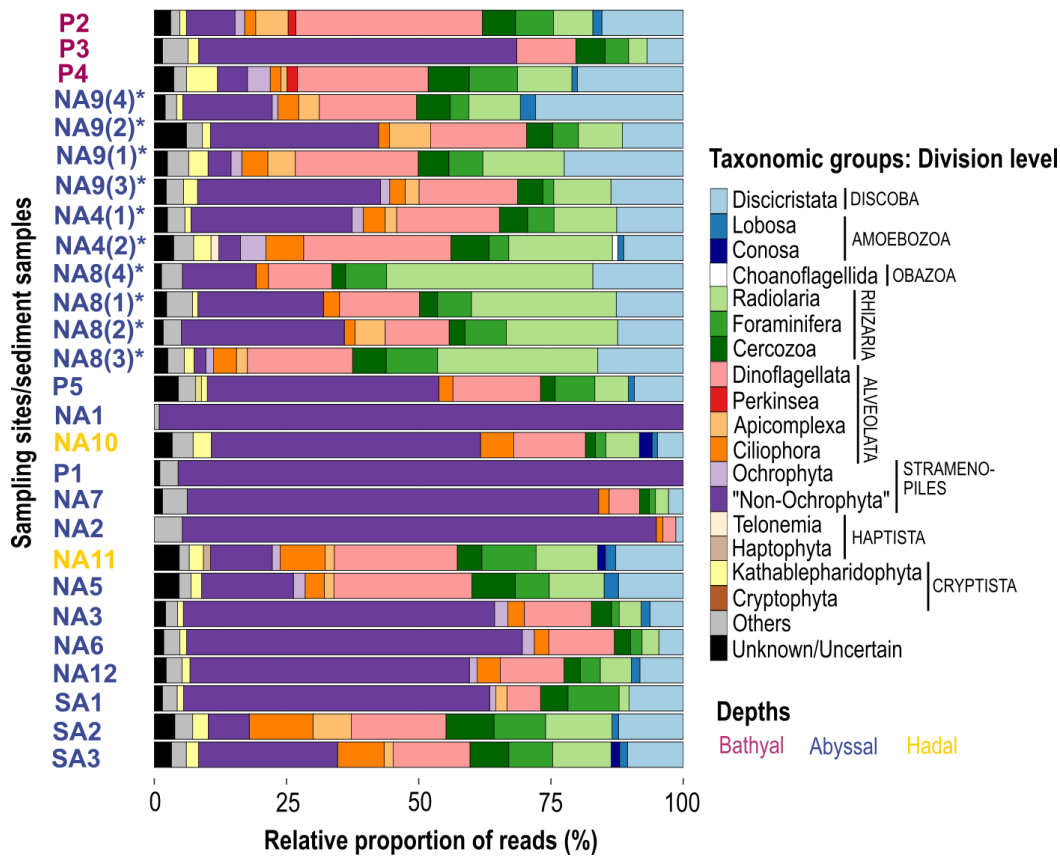

**Supplementary Figure 4 | Community composition of deep-sea heterotrophic protists.** Relative proportion of reads within the 27 deep-sea sediment samples related to the major taxonomic protist groups. Taxonomic groups (corresponding to division level in the PR2 database classification) are only separately shown, when the number of reads reached more than 1% within each sample. Otherwise, reads were clustered together into "Others". Unknown/Uncertain" reads have been either assigned to several taxonomic division levels or to sequences taxonomically assigned only to Eukaryota.

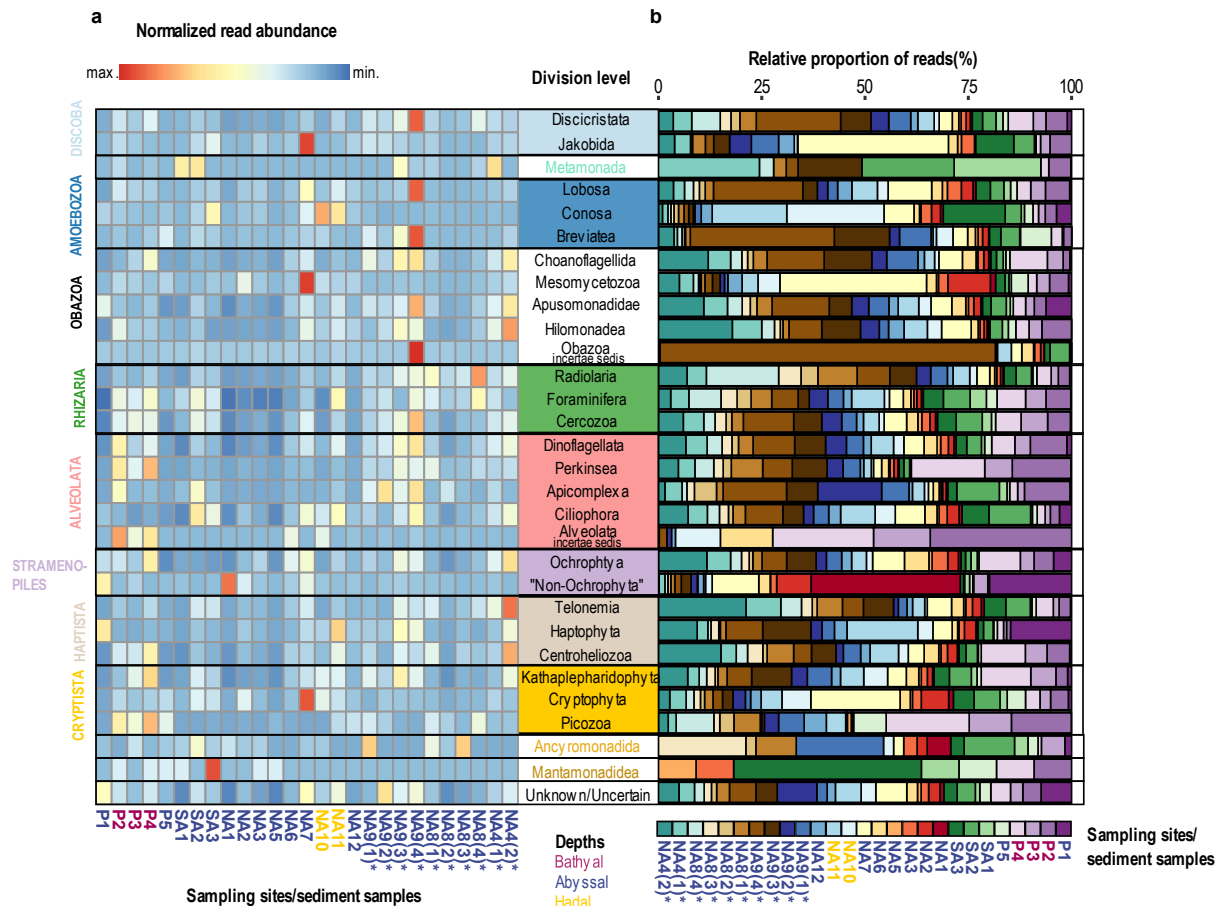

**Supplementary Figure 5 | Read abundance of deep-sea heterotrophic protists. (a)** Heatmap showing the read abundance of division levels per sampling site. Reads are normalized per division level by using the following function  $x\text{-mean}(x)/sd(x)$ , where  $x$  is the sum of reads per division level considering all sampling sites. **(b)** Relative abundance (read number) within the 27 deep-sea sediment samples assigned to the major taxonomic protist groups on division level. Reads are set to 100% per division level considering all 27 sampling sites.

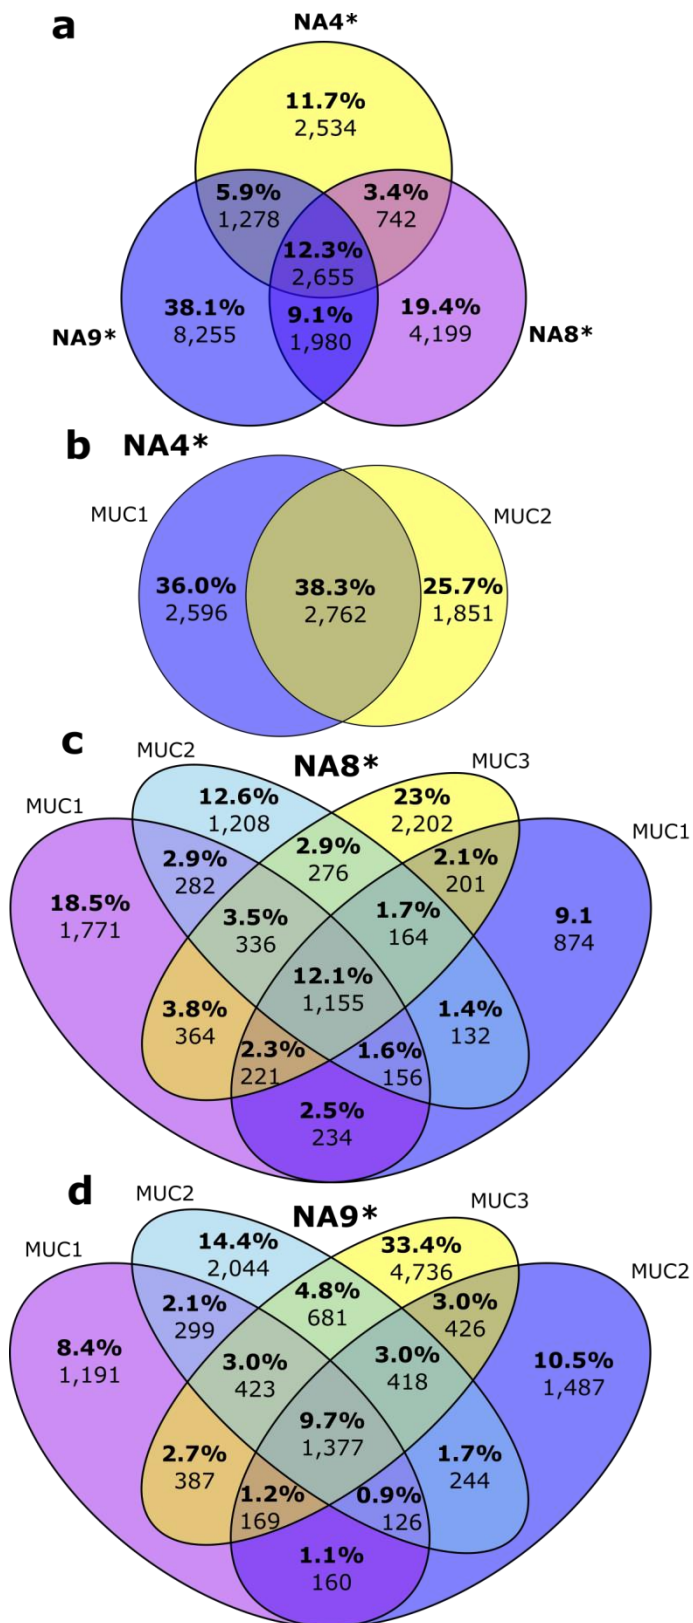

**Supplementary Figure 6 | Small scale pattern of deep-sea heterotrophic protists.** Number of shared and unique OTUs between (a) all three stations (inter-similarity, total richness = 21,643) and per station (intra-station similarity) for (b) station NA9\* (total richness = 14,168), (c) NA8\* (total richness = 9,576) and (d) NA4\* (total richness = 7,209) sampled during the deep-sea expedition (M139).

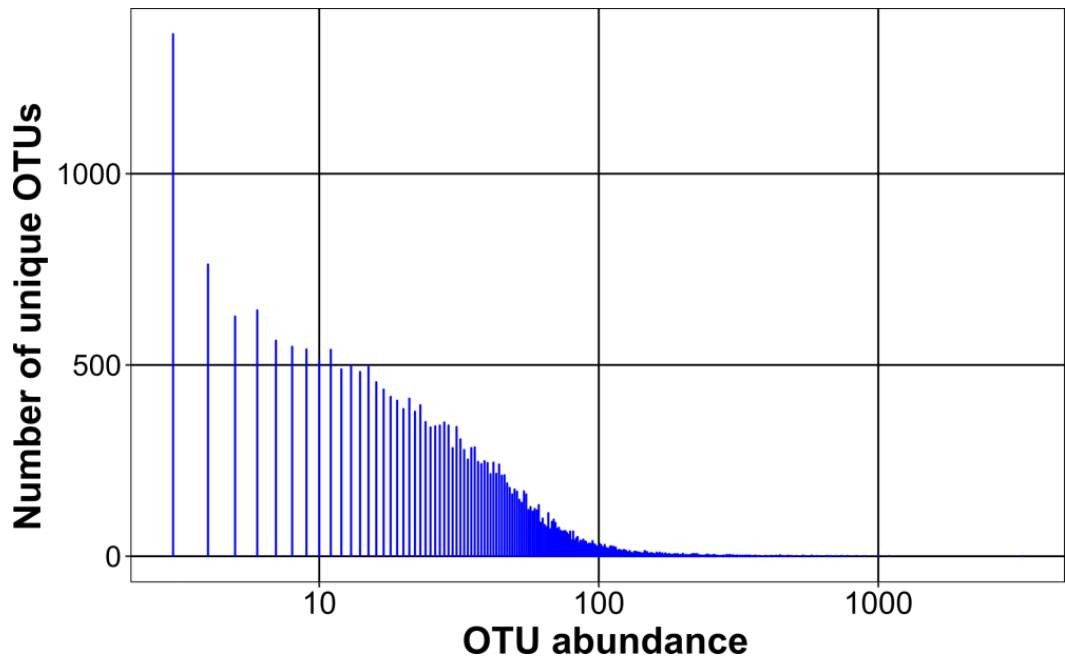

**Supplementary Figure 7 | Unique deep-sea protist communities.** Abundance of unique deep-sea heterotrophic protist OTUs. The x-axis is scaled logarithmically.



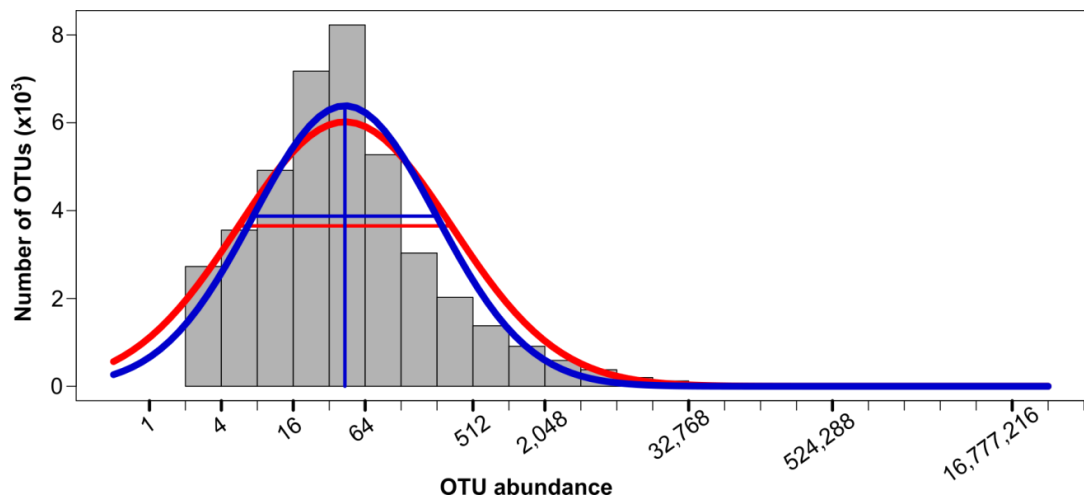

**Supplementary Figure 8 | Deep-sea heterotrophic protist OTU abundance distribution.** Most OTUs in our data set were represented by 16 to 64 reads. The OTU abundance distribution was fitted to the Preston-log normal model by using the Quasi-Poisson fit to octaves (red curve) and maximized likelihood to log<sub>2</sub> abundances (blue curve) approximations.

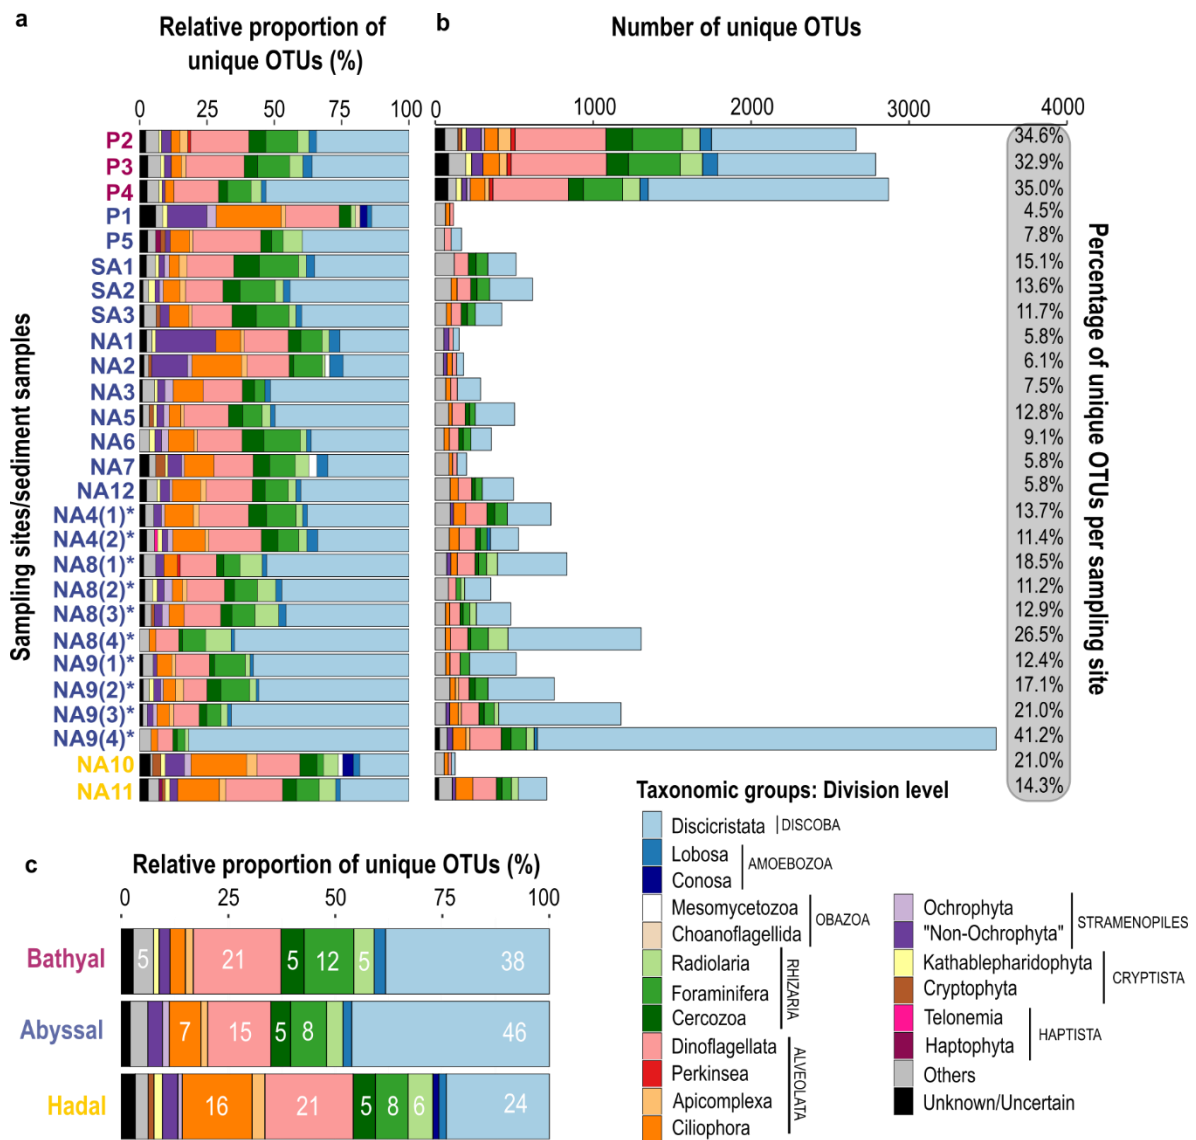

**Supplementary Figure 9 | Unique deep-sea heterotrophic protist richness amongst samples.** (a) Relative proportion of unique OTUs for each of the 27 sediment samples obtained from 20 deep-sea sites (see Fig. 1). (b) Total abundance of unique OTUs for each of the 27 sediment samples. Numbers (%) beside bar charts represent the percentage of unique OTUs of the total number of OTUs in each sediment sample. (c) Relative proportion of unique OTUs within the three depth zones.

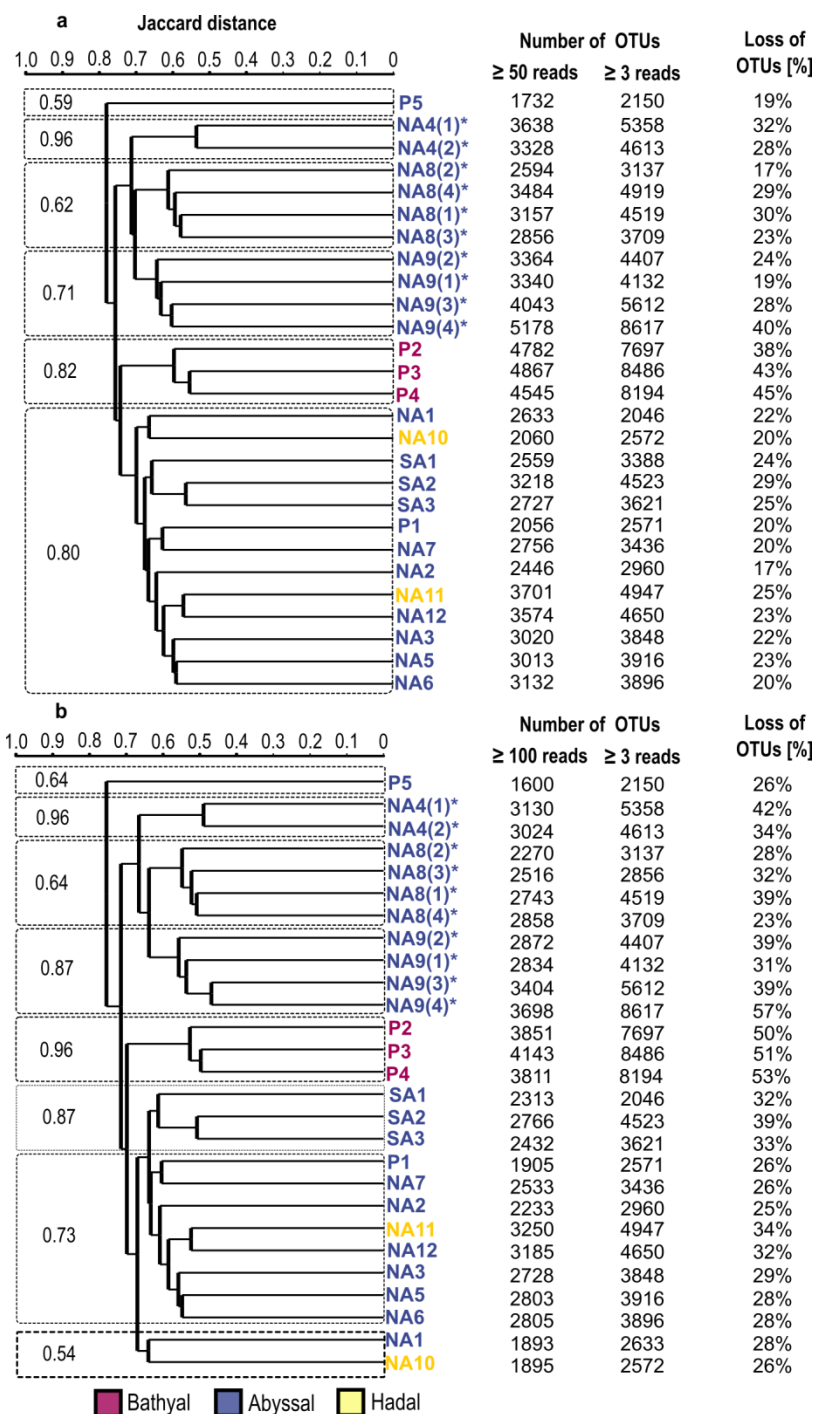

**Supplementary Figure 10 | Similarity of deep-sea protist communities.** Incidence-based clustering (Jaccard index) of heterotrophic protist community richness at the 27 sediment samples obtained from 11 deep-sea basins/regions visualized in dendrograms to investigate the impact of low abundant OTUs on clustering. **(a)** Only OTUs with  $\geq 50$  reads were considered (16,885 OTUs from 40,623 OTUs). **(b)** Only OTUs with  $\geq 100$  reads were considered (10,345 OTUs from 40,623 OTUs). The column “Loss of OTUs” shows the percentage of OTUs, which did not pass the filter criterion of either  $\geq 50$  reads or  $\geq 100$  reads per OTU, considering the total OTUs (containing  $\geq 3$  reads) per station.

**Supplementary Table 1 | Downstream analysis of the deep-sea dataset.** After merging of the paired reads and first filtering steps of our dataset including the removal of sequences without primers and sequences containing N's, we had a total of 181,441 OTUs and 203,500,576 reads. Number shown are OTUs and percentages as well as the number of reads and percentages of our second filtering approach including several filtering steps.

| <b>Filtering steps</b>         | <b>No. OTUs</b> | <b>OTUs [%] from total</b> | <b>No. reads</b> | <b>Reads [%] from total</b> |
|--------------------------------|-----------------|----------------------------|------------------|-----------------------------|
| Total                          | 181,441         | 100                        | 203,500,576      | 100                         |
| Only Eukaryota                 | 130,790         | 72.08                      | 148,334,764      | 72.89                       |
| Chimeras excluded              | 117,477         | 64.75                      | 148,081,692      | 72.77                       |
| Length - larger 87 bp          | 117,260         | 64.63                      | 148,079,269      | 72.77                       |
| Quality > 0.0002               | 116,004         | 63.93                      | 147,409,250      | 72.44                       |
| p-identity 80-100%             | 46,694          | 25.74                      | 66,410,396       | 32.63                       |
| Fungi excluded                 | 45,878          | 25.29                      | 65,600,598       | 32.24                       |
| Metazoa excluded               | 43,346          | 23.89                      | 57,773,422       | 28.39                       |
| Streptophyta excluded          | 42,929          | 23.66                      | 57,341,089       | 28.18                       |
| Phototrophic protists excluded | 40,623          | 22.39                      | 55,283,811       | 27.17                       |

**Supplementary Table 2 | Deep-sea heterotrophic protist alpha-diversity.** For each of the 27 separately analyzed sediment samples obtained from 20 deep-sea stations the total number of reads and OTUs after the final filtering is given. Different alpha-diversity indices were calculated per station.

| <b>Station Label</b> | <b>No. reads after filtering</b> | <b>No. OTUs after filtering</b> | <b>Shannon</b> | <b>Effective No of species</b> | <b>Simpson</b> | <b>Pielou</b> | <b>S.chao1</b> |
|----------------------|----------------------------------|---------------------------------|----------------|--------------------------------|----------------|---------------|----------------|
| NA9*(1)              | 992,112                          | 4132                            | 6.55           | 699.33                         | 1.00           | 0.79          | 5400           |
| NA9*(2)              | 1,556,801                        | 4407                            | 4.94           | 140.46                         | 0.91           | 0.59          | 5743           |
| NA9*(3)              | 2,250,478                        | 5612                            | 5.16           | 173.93                         | 0.90           | 0.60          | 6530           |
| NA9*(4)              | 3,063,394                        | 8617                            | 5.85           | 345.73                         | 0.97           | 0.65          | 9457           |
| NA8*(1)              | 1,307,963                        | 4519                            | 5.04           | 155.15                         | 0.93           | 0.60          | 5860           |
| NA8*(2)              | 729,118                          | 3137                            | 4.76           | 116.34                         | 0.91           | 0.59          | 4611           |
| NA8*(3)              | 674,194                          | 3709                            | 5.87           | 353.82                         | 0.98           | 0.71          | 4795           |
| NA8*(4)              | 1,689,816                        | 4919                            | 4.83           | 124.99                         | 0.93           | 0.57          | 5966           |
| NA4*(1)              | 1,484,986                        | 5358                            | 5.39           | 218.54                         | 0.92           | 0.63          | 6056           |
| NA4*(2)              | 1,330,043                        | 4613                            | 6.47           | 648.06                         | 0.99           | 0.77          | 5262           |
| NA1                  | 11,977,079                       | 2633                            | 0.13           | 1.14                           | 0.02           | 0.02          | 4256           |
| NA2                  | 3,060,458                        | 2960                            | 1.05           | 2.85                           | 0.21           | 0.13          | 4472           |
| NA3                  | 826,023                          | 3848                            | 3.56           | 35.13                          | 0.67           | 0.43          | 4618           |
| NA5                  | 185,447                          | 3916                            | 6.15           | 466.71                         | 0.98           | 0.74          | 4305           |
| NA6                  | 1,422,770                        | 3896                            | 3.24           | 25.45                          | 0.62           | 0.39          | 5078           |
| NA7                  | 4,768,941                        | 3436                            | 2.08           | 7.98                           | 0.42           | 0.26          | 4079           |
| NA10                 | 1,031,116                        | 2572                            | 3.50           | 33.13                          | 0.76           | 0.45          | 4398           |
| NA11                 | 1,303,169                        | 4947                            | 6.16           | 471.46                         | 0.99           | 0.72          | 5835           |
| NA12                 | 877,270                          | 4650                            | 4.05           | 57.39                          | 0.73           | 0.48          | 5714           |
| SA1                  | 985,992                          | 3621                            | 5.25           | 189.72                         | 0.93           | 0.64          | 4244           |
| SA2                  | 1,113,019                        | 4523                            | 5.92           | 372.93                         | 0.98           | 0.70          | 5327           |
| SA3                  | 687,467                          | 3388                            | 3.45           | 31.56                          | 0.68           | 0.42          | 4091           |
| P1                   | 6,845,141                        | 2571                            | 0.45           | 1.58                           | 0.10           | 0.06          | 3927           |
| P2                   | 1,403,123                        | 7697                            | 6.80           | 896.34                         | 0.99           | 0.76          | 8482           |
| P3                   | 1,868,307                        | 8486                            | 3.52           | 33.79                          | 0.65           | 0.39          | 9155           |
| P4                   | 1,271,499                        | 8194                            | 6.55           | 698.58                         | 0.99           | 0.73          | 9100           |
| P5                   | 578,085                          | 2150                            | 4.13           | 62.22                          | 0.84           | 0.54          | 3806           |
